# Supplementary material for: Fucoxanthin ameliorates traumatic brain injury by suppressing the blood–brain barrier disruption
Source: PubMed Central journal article supplement — iScience. 2023 Oct 20;26(11):108270. doi: 10.1016/j.isci.2023.108270 (PMC10641514; doi:10.1016/j.isci.2023.108270), 2023-10-20

iScience, Volume 26

## **Supplemental information**

**Fucoxanthin ameliorates traumatic brain injury  
by suppressing the blood–brain barrier disruption**

**Li Zhang, Zhigang Hu, Wanshan Bai, Yaonan Peng, Yixing Lin, and Zixiang Cong**

Supplemental figure 1. The diagram showing the experimental design throughout the study.

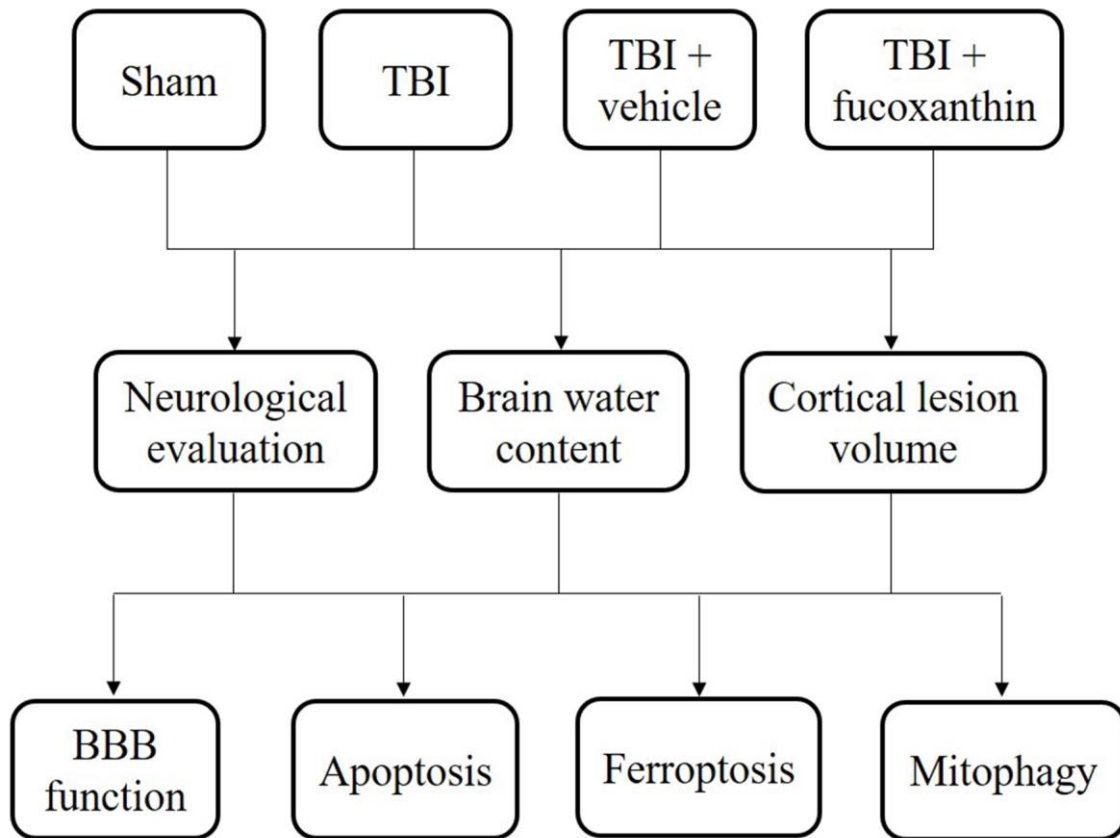

Supplement: mmc1.pdf [file mmc1.pdf]
